# Supplementary material for: Profiling of kidney involvement in systemic lupus erythematosus by deep learning using the National Database of Designated Incurable Diseases of Japan
Source: PubMed Central journal article supplement (PMC10191896; doi:10.1007/s10157-023-02337-x), 2023-03-16
Supplement: 10157_2023_2337_MOESM1_ESM.pdf [file 10157_2023_2337_MOESM1_ESM.pdf]

## **Supplementary information**

This PDF file includes:

Supplementary Tables S1–S5

Supplementary Figures S1

**Supplementary Table 1. Variables used in this study.**

| Input variables                                                      |           |                                        |           |                              |           |                                        |                    |                                                     |                                                                                    |
|----------------------------------------------------------------------|-----------|----------------------------------------|-----------|------------------------------|-----------|----------------------------------------|--------------------|-----------------------------------------------------|------------------------------------------------------------------------------------|
| Nursing care certification                                           | {1, 2, 3} | Muscle pain or myositis                | {1, 2, 3} | Cranial nerve disorder       | {1, 2, 3} | Cerebral infarction                    | {1, 2, 3}          | Creatinine                                          | {Continuous value}                                                                 |
| Degree of movement                                                   | {1, 2, 3} | Muscle weakness                        | {1, 2, 3} | Mononeuritis multiplex       | {1, 2, 3} | Compression fracture                   | {1, 2, 3}          | C3                                                  | {Continuous value}                                                                 |
| Personal care                                                        | {1, 2, 3} | Pericarditis                           | {1, 2, 3} | Disturbance of consciousness | {1, 2, 3} | Osteonecrosis                          | {1, 2, 3}          | C4                                                  | {Continuous value}                                                                 |
| Usual activities                                                     | {1, 2, 3} | Pulmonary hypertension                 | {1, 2, 3} | Cerebrovascular accident     | {1, 2, 3} | Disseminated intravascular coagulation | {1, 2, 3}          | CH50                                                | {Continuous value}                                                                 |
| Pain / discomfort                                                    | {1, 2, 3} | Interstitial pneumonia                 | {1, 2, 3} | Spinal cord injury           | {1, 2, 3} | Qualitative protein                    | {1, 2, 3}          | Anti-nuclear antibody                               | {20, 40, 60, 80, 100, 126, 160, 180, 320, 640, 1250, 1260, 1280, 2500, 2560, 5120} |
| Anxiety / depression                                                 | {1, 2, 3} | Pulmonary hemorrhage                   | {1, 2, 3} | Aseptic meningitis           | {1, 2, 3} | Qualitative occult blood               | {1, 2, 3}          | Anti-double-stranded DNA antibody titer             | {Continuous value}                                                                 |
| A fever of 38 degrees or higher that continues for more than 2 weeks | {1, 2, 3} | Pulmonary infarction                   | {1, 2, 3} | Visual impairment            | {1, 2, 3} | Red blood cells sediment               | {1, 2, 3}          | Elevated anti-DNA antibodies                        | {1, 2, 3}                                                                          |
| Facial erythema                                                      | {1, 2, 3} | Pleurisy                               | {1, 2, 3} | Lupus headache               | {1, 2, 3} | Granular cast sediment                 | {1, 2, 3}          | Anti-U1-RNP antibody                                | {1, 2, 3}                                                                          |
| Discoid rash                                                         | {1, 2, 3} | Rapidly progressive glomerulonephritis | {1, 2, 3} | Hemolytic anemia             | {1, 2, 3} | Hematuria                              | {1, 2, 3}          | Anti-Sm antibody                                    | {1, 2, 3}                                                                          |
| Photosensitivity                                                     | {1, 2, 3} | Nephrotic syndrome                     | {1, 2, 3} | Vasculitis                   | {1, 2, 3} | Pyuria                                 | {1, 2, 3}          | Anti-SS-A antibody                                  | {1, 2, 3}                                                                          |
| Cold extremities, numbness, Raynaud's phenomenon                     | {1, 2, 3} | Acute renal failure                    | {1, 2, 3} | Malignant tumor              | {1, 2, 3} | White blood cell count                 | {Continuous value} | Anti-SS-B antibody                                  | {1, 2, 3}                                                                          |
| Hair loss                                                            | {1, 2, 3} | Chronic renal failure                  | {1, 2, 3} | Infection                    | {1, 2, 3} | Hemoglobin                             | {Continuous value} | Serum syphilis reaction (biological false positive) | {1, 2, 3}                                                                          |
| Gastrointestinal ulcer                                               | {1, 2, 3} | Seizures                               | {1, 2, 3} | Diabetes                     | {1, 2, 3} | Platelet                               | {Continuous value} | anticardiolipin antibody                            | {1, 2, 3}                                                                          |
| Oral or nasal ulcers                                                 | {1, 2, 3} | Psychiatric symptoms                   | {1, 2, 3} | High blood pressure          | {1, 2, 3} | Lymphocyte                             | {Continuous value} | Anti-CLβ2GP1 antibody                               | {1, 2, 3}                                                                          |
| Arthritis (nondestructive, ≥2 sites)                                 | {1, 2, 3} | Organic brain disorder                 | {1, 2, 3} | Myocardial infarction        | {1, 2, 3} | C-reactive protein                     | {Continuous value} | Lupus anticoagulant                                 | {1, 2, 3}                                                                          |

**Supplementary Table S2. Background demographics of the patients.**

|                                                                      | Total patients<br>n = 1,655 |                 |                 | Patients with kidney involvement<br>n = 894 |                 |                 |
|----------------------------------------------------------------------|-----------------------------|-----------------|-----------------|---------------------------------------------|-----------------|-----------------|
|                                                                      | Median                      | 25%<br>quartile | 75%<br>quartile | Median                                      | 25%<br>quartile | 75%<br>quartile |
| Continuous variables                                                 |                             |                 |                 |                                             |                 |                 |
| White blood cell ( $\mu\text{L}$ )                                   | 3900                        | 2800            | 5900            | 3725                                        | 2700            | 5800            |
| Hb (g/dL)                                                            | 11.2                        | 9.7             | 12.7            | 10.9                                        | 9.2             | 12.375          |
| Platelet ( $\times 10^4/\mu\text{L}$ )                               | 18.9                        | 12.2            | 24.85           | 18                                          | 11.2            | 24.5            |
| Lymphocyte ( $/\text{mm}^3$ )                                        | 902                         | 606.5           | 1294            | 870                                         | 598.5           | 1230            |
| C reactive protein (mg/dL)                                           | 0.3                         | 0.085           | 1.37            | 0.3                                         | 0.0925          | 1.475           |
| Serum creatinine (mg/dL)                                             | 0.63                        | 0.53            | 0.82            | 0.675                                       | 0.55            | 0.94            |
| C3 (mg/dL)                                                           | 63                          | 41.15           | 86.5            | 57                                          | 36.7            | 82              |
| C4 (mg/dL)                                                           | 10                          | 5               | 17              | 8.7                                         | 4.3             | 15              |
| CH50 (U/dL)                                                          | 27.4                        | 14              | 40.85           | 24                                          | 12              | 37.725          |
| Anti-nuclear antibody titer                                          | 640                         | 160             | 1280            | 640                                         | 160             | 1280            |
| Anti-ds DNA antibody titer                                           | 28                          | 10              | 120.05          | 38.05                                       | 10              | 210             |
| Categorical variables                                                | 1                           | 2               | 3               | 1                                           | 2               | 3               |
| Nursing care certification                                           | 34                          | 17              | 1604            | 16                                          | 10              | 868             |
| Degree of movement                                                   | 1069                        | 539             | 47              | 568                                         | 298             | 28              |
| Personal care                                                        | 1196                        | 396             | 63              | 642                                         | 216             | 36              |
| Usual activities                                                     | 917                         | 675             | 63              | 496                                         | 360             | 38              |
| Pain / discomfort                                                    | 719                         | 809             | 127             | 398                                         | 424             | 72              |
| Anxiety / depression                                                 | 986                         | 589             | 80              | 530                                         | 314             | 50              |
| A fever of 38 degrees or higher that continues for more than 2 weeks | 525                         | 1085            | 45              | 294                                         | 576             | 24              |
| Facial erythema                                                      | 761                         | 888             | 6               | 401                                         | 491             | 2               |
| Discoid rash                                                         | 336                         | 1311            | 8               | 165                                         | 726             | 3               |
| Photosensitivity                                                     | 606                         | 1013            | 36              | 302                                         | 573             | 19              |
| Cold extremities, numbness, Raynaud's phenomenon                     | 617                         | 1028            | 10              | 298                                         | 591             | 5               |
| Hair loss                                                            | 495                         | 1141            | 19              | 247                                         | 638             | 9               |
| Gastrointestinal ulcer                                               | 55                          | 1346            | 254             | 25                                          | 739             | 130             |
| Oral or nasal ulcers                                                 | 398                         | 1238            | 19              | 223                                         | 661             | 10              |
| Arthritis (nondestructive, $\geq 2$ sites)                           | 1091                        | 563             | 1               | 539                                         | 354             | 1               |
| Muscle pain or myositis                                              | 454                         | 1188            | 13              | 228                                         | 660             | 6               |
| Muscle weakness                                                      | 332                         | 1305            | 18              | 177                                         | 708             | 9               |
| Pericarditis                                                         | 246                         | 1362            | 47              | 148                                         | 727             | 19              |
| Pulmonary hypertension                                               | 42                          | 1449            | 164             | 16                                          | 800             | 78              |
| Interstitial pneumonia                                               | 135                         | 1503            | 17              | 71                                          | 811             | 12              |
| Pulmonary hemorrhage                                                 | 27                          | 1613            | 15              | 15                                          | 873             | 6               |
| Pulmonary infarction                                                 | 17                          | 1604            | 34              | 12                                          | 869             | 13              |
| Pleuritis                                                            | 283                         | 1353            | 19              | 165                                         | 718             | 11              |
| Rapidly progressive glomerulonephritis                               | 140                         | 1485            | 30              | 123                                         | 753             | 18              |
| Nephrotic syndrome                                                   | 272                         | 1375            | 8               | 244                                         | 646             | 4               |
| Acute renal failure                                                  | 129                         | 1513            | 13              | 115                                         | 773             | 6               |
| Chronic renal failure                                                | 153                         | 1492            | 10              | 114                                         | 770             | 10              |

(Continues)

|                                                        |      |      |     |     |     |     |
|--------------------------------------------------------|------|------|-----|-----|-----|-----|
| Seizures                                               | 57   | 1595 | 3   | 26  | 867 | 1   |
| Psychiatric symptoms                                   | 135  | 1507 | 13  | 65  | 822 | 7   |
| Organic brain disorder                                 | 48   | 1591 | 16  | 31  | 854 | 9   |
| Cranial nerve disorder                                 | 35   | 1614 | 6   | 16  | 876 | 2   |
| Mononeuritis multiplex                                 | 68   | 1569 | 18  | 32  | 849 | 13  |
| Disturbance of consciousness                           | 71   | 1581 | 3   | 40  | 851 | 3   |
| Cerebrovascular accident                               | 104  | 1531 | 20  | 59  | 826 | 9   |
| Spinal cord injury                                     | 9    | 1637 | 9   | 3   | 888 | 3   |
| Aseptic meningitis                                     | 37   | 1600 | 18  | 15  | 871 | 8   |
| Visual impairment                                      | 49   | 1589 | 17  | 26  | 860 | 8   |
| Lupus headache                                         | 149  | 1481 | 25  | 71  | 808 | 15  |
| Hemolytic anemia                                       | 212  | 1419 | 24  | 120 | 763 | 11  |
| Vasculitis                                             | 126  | 1484 | 45  | 72  | 796 | 26  |
| Malignant tumor                                        | 29   | 1573 | 53  | 18  | 843 | 33  |
| Infection                                              | 118  | 1521 | 16  | 75  | 812 | 7   |
| Diabetes                                               | 143  | 1511 | 1   | 95  | 798 | 1   |
| High blood pressure                                    | 323  | 1330 | 2   | 217 | 675 | 2   |
| Myocardial infarction                                  | 15   | 1638 | 2   | 10  | 882 | 2   |
| Cerebral infarction                                    | 94   | 1551 | 10  | 50  | 838 | 6   |
| Compression fracture                                   | 47   | 1603 | 5   | 22  | 871 | 1   |
| Osteonecrosis                                          | 38   | 1606 | 11  | 14  | 877 | 3   |
| Disseminated intravascular<br>coagulation              | 16   | 1635 | 4   | 11  | 882 | 1   |
| Qualitative protein                                    | 868  | 778  | 9   | 606 | 288 | 0   |
| Qualitative occult blood                               | 670  | 974  | 11  | 493 | 401 | 0   |
| Red blood cells sediment                               | 616  | 999  | 40  | 476 | 409 | 9   |
| Granular cast sediment                                 | 422  | 1182 | 51  | 375 | 504 | 15  |
| Hematuria                                              | 390  | 1246 | 19  | 316 | 574 | 4   |
| Pyuria                                                 | 262  | 1373 | 20  | 200 | 690 | 4   |
| Elevated anti-DNA antibodies                           | 1127 | 380  | 148 | 616 | 193 | 85  |
| Anti-U1-RNP antibody                                   | 503  | 1152 | 0   | 358 | 536 | 0   |
| Anti-Sm antibody                                       | 909  | 746  | 0   | 283 | 611 | 0   |
| Anti-SS-A antibody                                     | 270  | 1385 | 0   | 496 | 398 | 0   |
| Anti-SS-B antibody                                     | 122  | 1207 | 326 | 144 | 750 | 0   |
| Serum syphilis reaction<br>(biological false positive) | 388  | 1267 | 0   | 71  | 680 | 143 |
| anticardiolipin antibody                               | 223  | 1432 | 0   | 231 | 663 | 0   |
| Anti-CL $\beta$ 2GP1 antibody                          | 278  | 1377 | 0   | 124 | 770 | 0   |
| Lupus anticoagulant                                    | 278  | 1377 | 0   | 154 | 740 | 0   |

Data, median (range) or count.

**Supplementary Table S3.** Means of first-order partial differential values for each feature vector.

| Feature vector | White blood cell | Hemoglobin | Platelet | Lymphocyte | C-reactive protein | Creatinine | C3       | C4       | CH50     | Anti-nuclear antibody | Anti-ds DNA antibody | Anti-DNA antibody |
|----------------|------------------|------------|----------|------------|--------------------|------------|----------|----------|----------|-----------------------|----------------------|-------------------|
| X              | -0.35182         | -0.15588   | -0.15748 | -0.20569   | -0.19229           | -0.07798   | -0.18722 | -0.16346 | -0.18231 | -0.05507              | -0.13679             | -0.07116          |
| Y              | 0.014145         | -0.10085   | -0.10945 | -0.12896   | 0.075542           | -0.02225   | -0.1287  | -0.08133 | -0.11243 | -0.08745              | -0.30514             | -0.03858          |
| Z              | 0.005763         | 0.066288   | 0.089267 | -0.04619   | -0.00432           | 0.013037   | 0.09402  | 0.059518 | 0.085403 | 0.238002              | 0.057184             | 0.02722           |

**Supplementary Table S4.** Anti-dsDNA antibody titers on the two-dimensional (x, z) feature plane.

□

Mean

|          |          |          |          |          |       |
|----------|----------|----------|----------|----------|-------|
| 167.8    | 140.525  | 154.45   | 169.6    | nan      | nan   |
| 191.2593 | 154.5962 | 121.5368 | 64.55455 | 17.825   | nan   |
| 143.4217 | 145.9036 | 90.57805 | 97.91538 | 6.95     | 46.05 |
| 140.6935 | 144.622  | 106.01   | 100.0455 | 27.98333 | 96.5  |
| 149.8196 | 125.7655 | 98.44762 | 34.615   | 15.27778 | nan   |
| 72.57971 | 44.48308 | 41.12034 | 40.77576 | 68.2     | nan   |

Standard deviation

|          |          |          |          |          |          |
|----------|----------|----------|----------|----------|----------|
| 210.3786 | 173.0942 | 171.9515 | 122.1881 | nan      | nan      |
| 159.4068 | 154.8605 | 153.6    | 122.837  | 18.56491 | nan      |
| 153.6104 | 150.2964 | 119.6988 | 139.1988 | 4.313351 | 63.5689  |
| 152.0417 | 139.1509 | 134.9732 | 122.4473 | 32.16675 | 19.09188 |
| 155.4981 | 141.7536 | 138.1594 | 88.51956 | 23.67297 | nan      |
| 108.7276 | 52.30433 | 71.5027  | 71.25942 | 125.3113 | nan      |

The two-dimensional (x, z) feature plane was divided into 6x6 cells to generate 36 areas. The means and standard deviations for each of these 36 areas are given in the tables (means, upper table; standard deviations, lower table).

**Supplementary Table S5.** Antinuclear antibody titers on the two-dimensional (x, z) feature plane.

Mean

|          |          |          |          |          |      |
|----------|----------|----------|----------|----------|------|
| 5120     | 5120     | 5120     | 5120     | -        | -    |
| 2560     | 2560     | 2560     | 2554.545 | 2560     | -    |
| 1279.71  | 1280     | 1279.512 | 1280     | 1280     | 1280 |
| 640      | 655.6098 | 728      | 669.0909 | 750      | 800  |
| 316.8627 | 345.5172 | 335.2381 | 240      | 173.3333 | -    |
| 117.1014 | 121.3231 | 111.5068 | 121      | 120      | -    |

Standard deviation

|          |          |          |          |          |          |
|----------|----------|----------|----------|----------|----------|
| 0        | 0        | 0        | 0        | -        | -        |
| 0        | 0        | 0        | 18.09068 | 0        | -        |
| 2.407717 | 0        | 3.123475 | 0        | 0        | 0        |
| 0        | 99.95121 | 240.205  | 224.2077 | 432.5401 | 678.8225 |
| 59.78261 | 109.6614 | 126.4764 | 139.1705 | 140      | -        |
| 72.70208 | 80.92456 | 99.3976  | 89.36162 | 91.65151 | -        |

The two-dimensional (x, z) feature plane was divided into 6x6 cells to generate 36 areas. The means and standard deviations for each of these 36 areas are given in the tables (means, upper table; standard deviations, lower table).

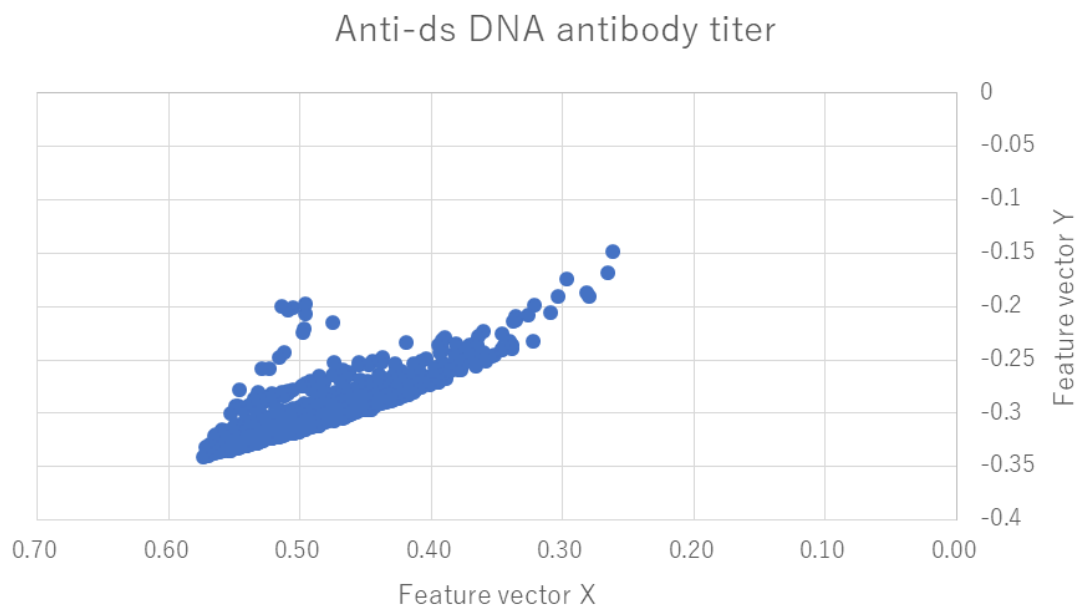

**Supplementary Figure S1. Anti-dsDNA antibody titers on the two-dimensional (x, z) feature plane.** While the anti-dsDNA antibody titer increases as the y-axis value decreases, the rate of increase rises as the x-axis value increases. Therefore, on the two-dimensional (x, z) feature plane, it appears that the anti-dsDNA antibody titer increases in the direction of x-axis.
